# Supplementary material for: Evolution of Microstructure and Mechanical Properties of Mg-6Al Alloy Processed by Differential Speed Rolling upon Post-Annealing Treatment
Source: MDPI journal article supplement (doi:10.3390/met11060926), 2021-06-07
Supplement: s1 [file s1]

Archive with 1 entries (1 files):
- metals-1218132-supplementary.pdf
