# Supplementary material for: Evolution of Microstructure and Mechanical Properties of Mg-6Al Alloy Processed by Differential Speed Rolling upon Post-Annealing Treatment
Source: MDPI journal article supplement (doi:10.3390/met11060926), 2021-06-07
Supplement: s1 [file s1 › metals-1218132-supplementary.pdf]

# Evolution of microstructure and mechanical properties of Mg-6Al alloy processed by differential speed rolling upon post-annealing treatment

Honglin Zhang<sup>1</sup>, Zhigang Xu<sup>1,\*</sup>, Sergey Yarmolenko<sup>1</sup>, Laszlo J. Kecskes<sup>2</sup>, Jagannathan Sankar<sup>1</sup>

<sup>1</sup> North Carolina A&T State University, Greensboro, 27411, North Carolina, USA; hzhang2@aggies.ncat.edu (H.Z.); sergey@ncat.edu (S.Y.)

<sup>2</sup> Hopkins Extreme Materials Institute, The Johns Hopkins University, Baltimore, 21218, Maryland, USA; lkecske1@jhu.edu (L.K.)

\* Correspondence: zhigang@ncat.edu, Tel: +1336-285-3224

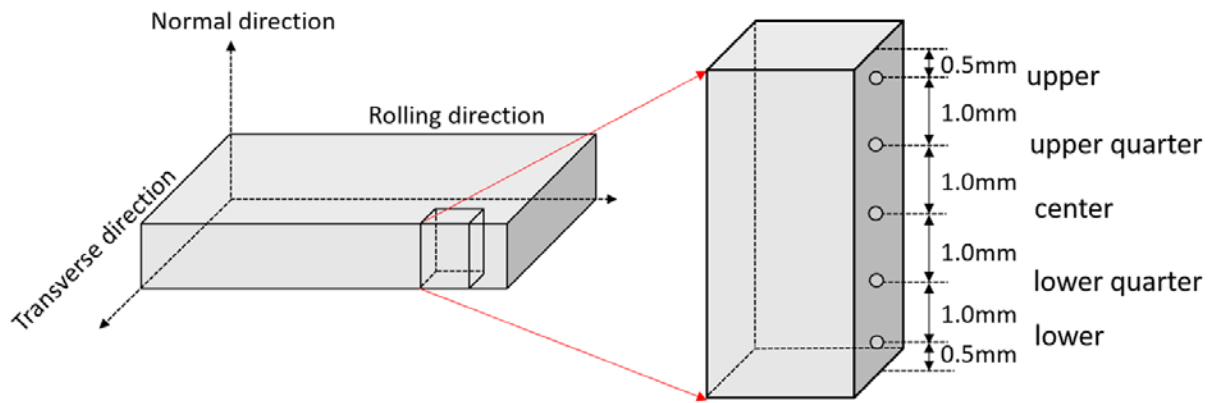

**Figure S1.** A schematic showing the five (5) different positions for EBSD analysis through the thickness of a plate.

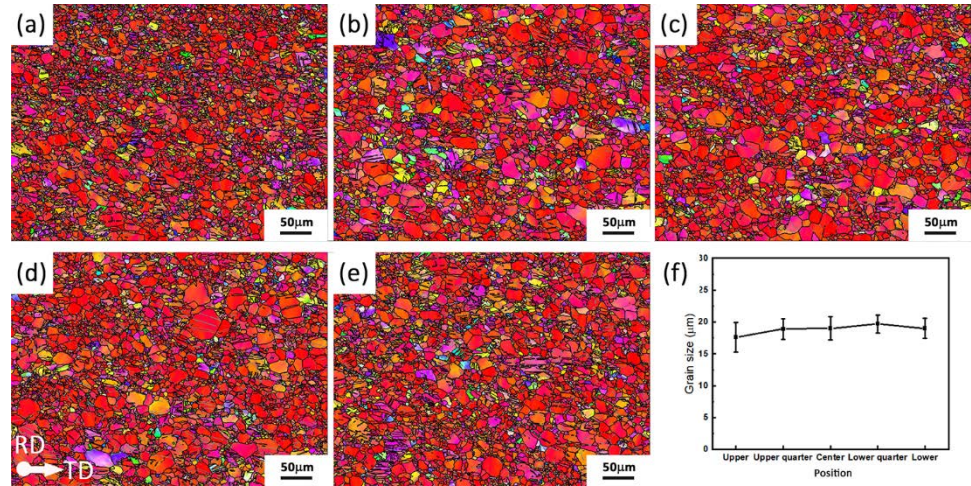

**Figure S2.** Inverse pole figure maps on the RD plane of the as-rolled plate at different positions across the thickness: (a) upper, (b) upper quarter, (c) center, (d) lower quarter, and (e) lower position; and (f) shows the average grain size at these positions.

Note: although the IPF maps represent the grain morphologies in the RD plane, the orientation information (color) is taken from the IPF-Y direction which aligns with the ND. This was done to be consistent with the convention in the manuscript. All of the remaining IPF maps are constructed in this way.

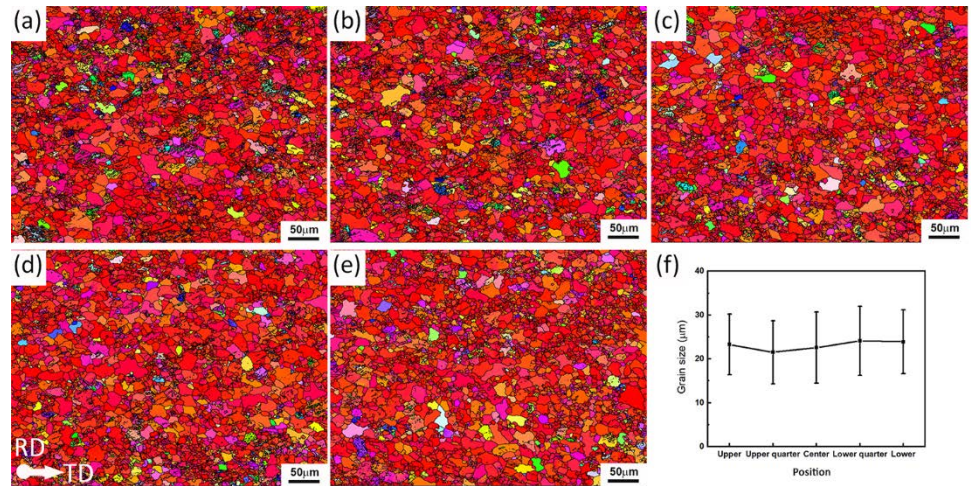

**Figure S3.** Inverse pole figure maps on the RD plane of the annealed plate (250°C) at different positions across the thickness: (a) upper, (b) upper quarter, (c) center, (d) lower quarter, and (e) lower position; and (f) shows the average grain size at these positions.

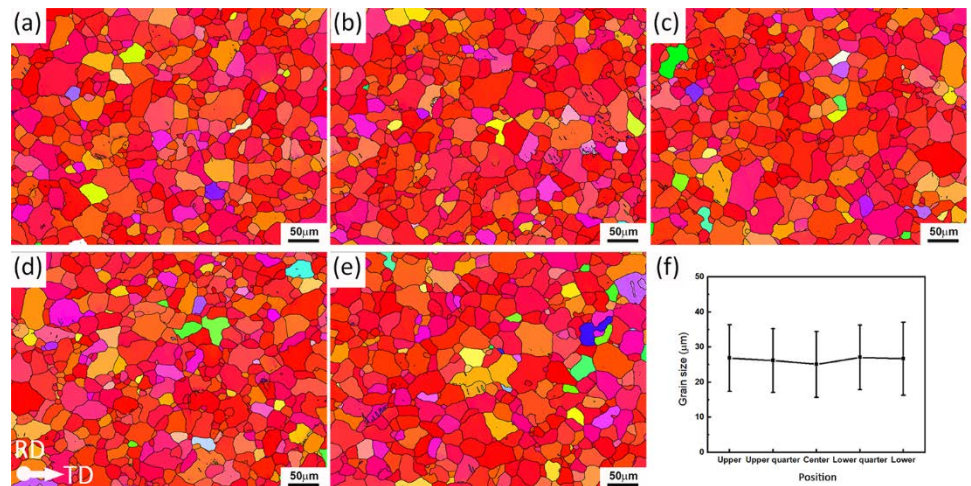

**Figure S4.** Inverse pole figure maps on the RD plane of the annealed plate (275°C) at different positions across the thickness: (a) upper, (b) upper quarter, (c) center, (d) lower quarter, and (e) lower position; and (f) shows the average grain size at these positions.

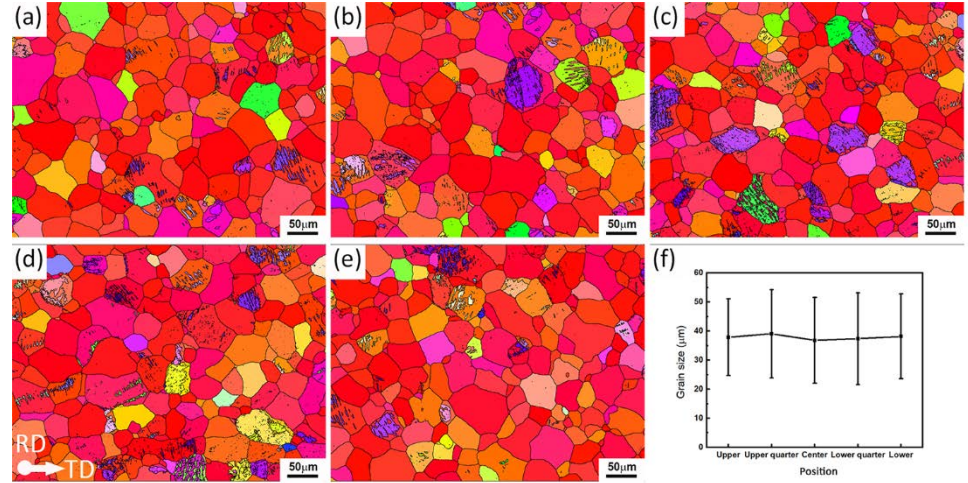

**Figure S5.** Inverse pole figure maps on the RD plane of the annealed plate (300°C) at different positions across the thickness: (a) upper, (b) upper quarter, (c) center, (d) lower quarter, and (e) lower position; and (f) shows the average grain size at these positions.

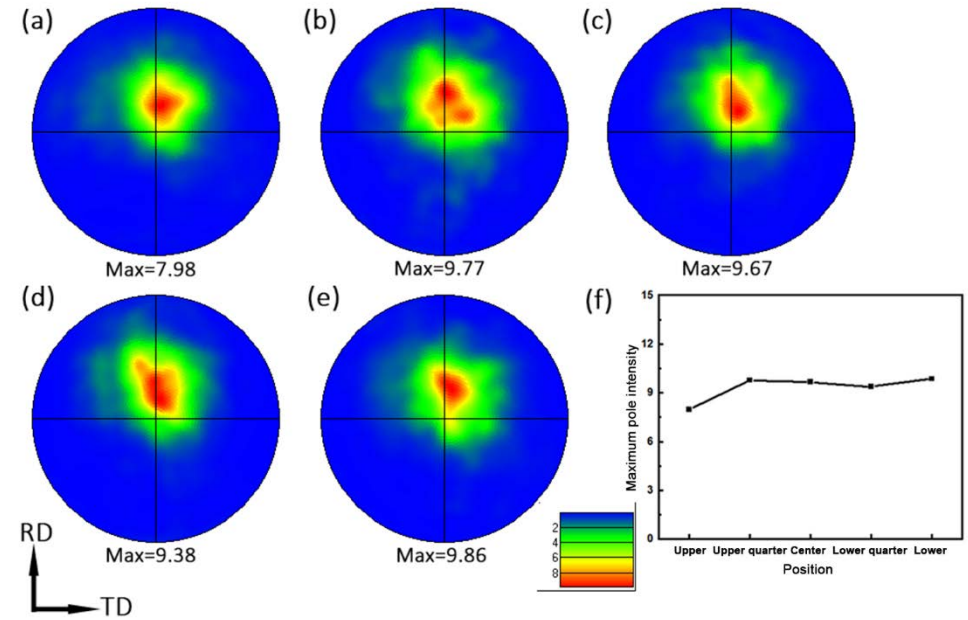

**Figure S6.** {0001} pole figures of the as-rolled plate at different positions across the thickness: (a) upper, (b) upper quarter, (c) center, (d) lower quarter, and (e) lower position; and (f) shows the maximum pole intensities at these positions.

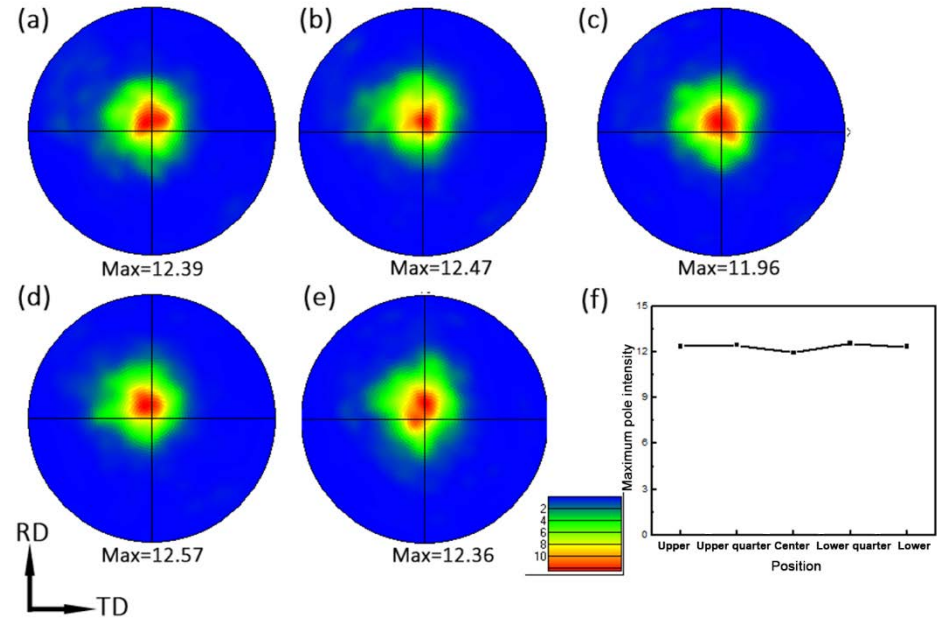

**Figure S7.** {0001} pole figures of the annealed plate (250°C) at different positions across the thickness: (a) upper, (b) upper quarter, (c) center, (d) lower quarter, and (e) lower position; and (f) shows the maximum pole intensities at these positions.

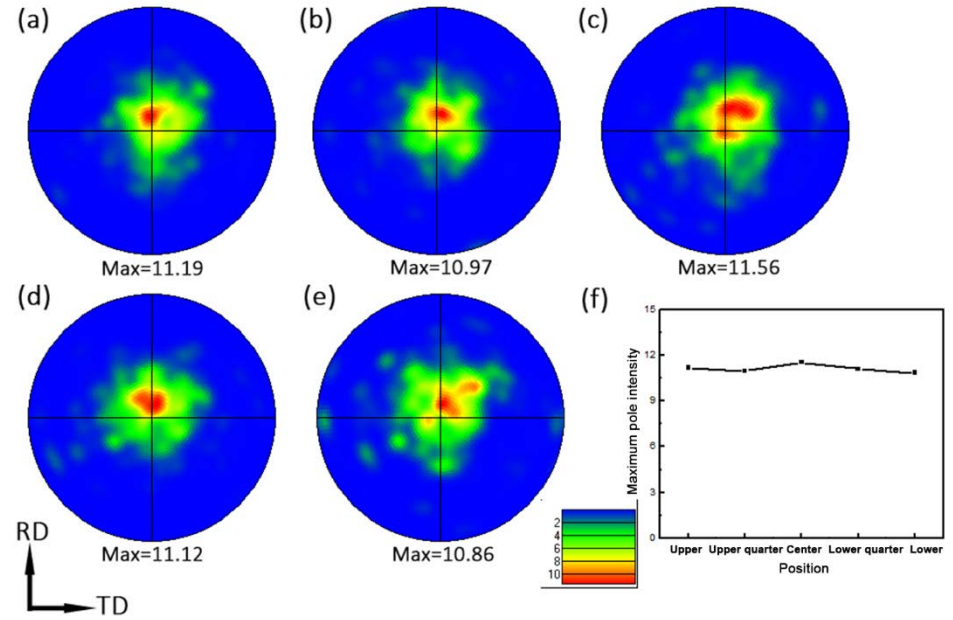

**Figure S8.** {0001} pole figures of the annealed plate (275°C) at different positions across the thickness: (a) upper, (b) upper quarter, (c) center, (d) lower quarter, and (e) lower position; and (f) shows the maximum pole intensities at these positions.

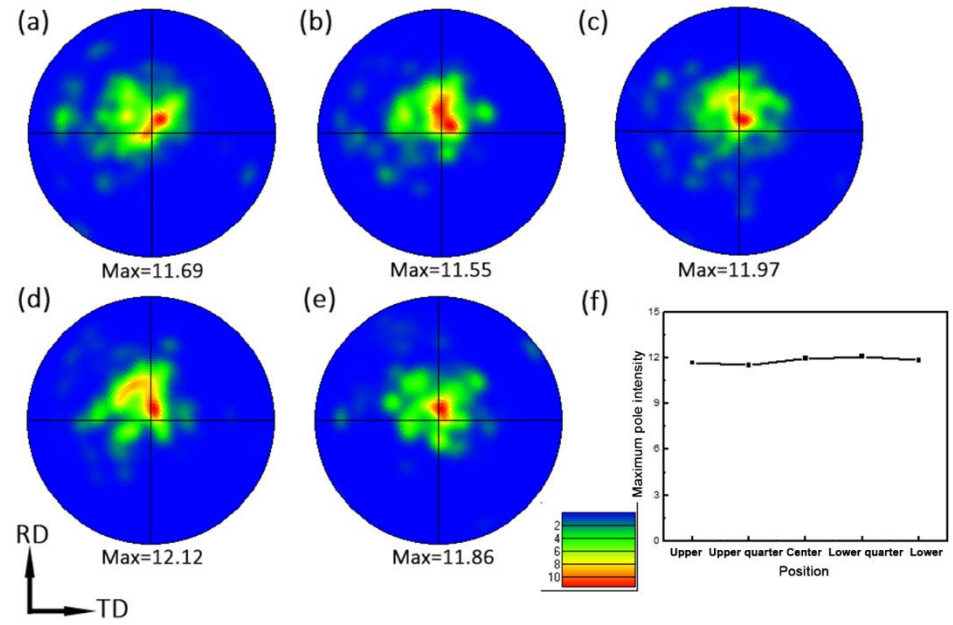

**Figure S9.** {0001} pole figures of the annealed plate (300°C) at different positions across the thickness: (a) upper, (b) upper quarter, (c) center, (d) lower quarter, and (e) lower position; and (f) shows the maximum pole intensities at these positions.
